# Supplementary material
Source: PubMed Central journal article supplement (PMC3802553)
Supplement: NIHMS499072-supplement-01.pdf [file NIHMS499072-supplement-01.pdf]

Type of file: table

Label: Table

Filename: pmic\_200800638\_sm\_table.csv







----,----,----,----,----,-1.78,2.55E-06  
 C8orf53,AI056895,chromosome 8 open reading frame 53,227402\_s\_at,----,----,----,----,  
 ----,----,----,----,-2.11,6.76E-08  
 C8orf59,BF674436,chromosome 8 open reading frame 59,226165\_at,----,----,----,----,  
 ----,----,----,----,-1.55,9.97E-06  
 C9orf5,BG402553,chromosome 9 open reading frame 5,223005\_s\_at,----,----,----,----,  
 ----,----,----,----,1.92,2.46E-06  
 C9orf5,AA495988,chromosome 9 open reading frame 5,223007\_s\_at,----,----,----,----,  
 ----,----,----,----,2.33,6.61E-08  
 C9orf5,AF153415,chromosome 9 open reading frame 5,223008\_s\_at,----,----,----,----,  
 ----,----,----,----,2.39,2.51E-09  
 C9orf5,AL567431,chromosome 9 open reading frame 5,223006\_s\_at,----,----,----,----,  
 ----,----,----,----,2.67,1.32E-09  
 C9orf85,AA824363,chromosome 9 open reading frame 85,238912\_x\_at,----,----,----,----,  
 ----,----,----,----,-1.72,1.86E-04  
 CAB39,NM\_016289,calcium binding protein 39,217873\_at,----,----,----,----,----,----,  
 ----,----,----,----,-2.35,2.71E-08  
 CADM1,NM\_014333,cell adhesion molecule 1,209030\_s\_at,----,----,----,----,----,----,  
 ----,----,----,----,2.52,7.62E-09  
 CALD1,AL577531,caldesmon 1,201616\_s\_at,----,----,----,----,----,----,----,----,----,1.6  
 8,7.00E-07  
 CALD1,AL583520,caldesmon 1,212077\_at,----,----,----,----,----,----,----,----,----,1.76,  
 7.44E-06  
 CALD1,NM\_004342,caldesmon 1,201617\_x\_at,----,----,----,----,----,----,----,----,----,2.  
 23,1.19E-07  
 CALM1,AI653730,"calmodulin 1 (phosphorylase kinase, delta)",211984\_at,----,----,  
 ----,----,----,----,----,----,----,----,----,1.59,1.73E-04  
 CALM3,AA807959,"Calmodulin 3 (phosphorylase kinase, delta)",1563431\_x\_at,----,----,  
 ----,----,----,----,----,----,----,----,----,1.68,0.001555  
 CAMSAP1,AL043774,calmodulin regulated spectrin-associated protein 1,212710\_at,----,----,  
 ----,----,----,----,----,----,----,----,----,1.58,4.40E-04  
 CAMTA1,AV756867,calmodulin binding transcription activator 1,225692\_at,----,----,  
 ----,----,----,----,----,----,----,----,----,1.51,3.62E-05  
 CAP2,N90755,"CAP, adenylate cyclase-associated protein, 2 (yeast)",212554\_at,----,----,  
 ----,----,----,----,----,----,----,----,----,1.79,8.05E-06  
 CAPZB,AL572341,"capping protein (actin filament) muscle Z-line, beta",201949\_x  
 at,----,----,----,----,----,----,----,----,----,1.59,1.01E-04  
 CAPZB,NM\_004930,"capping protein (actin filament) muscle Z-line, beta",201950  
 x\_at,----,----,----,----,----,----,----,----,----,1.61,5.61E-05  
 CAPZB,U03271,"capping protein (actin filament) muscle Z-line, beta",37012\_at,----,----,  
 ----,----,----,----,----,----,----,----,----,1.75,1.20E-05  
 CARS,AI769685,cysteinyl-tRNA synthetase,212971\_at,----,----,----,----,----,----,----,----,  
 ----,----,----,----,-3.75,1.75E-12  
 CARS,NM\_001751,cysteinyl-tRNA synthetase,202402\_s\_at,----,----,----,----,----,----,----,----,  
 ----,----,----,----,-3.52,3.06E-11  
 CASP2,AU153405,"caspase 2, apoptosis-related cysteine peptidase (neural precursor  
 cell expressed, developmentally down-regulated 2)",226032\_at,----,----,----,----,----,----,  
 ----,----,----,----,1.55,2.85E-04  
 CBLB,U26710,Cas-Br-M (murine) ecotropic retroviral transforming sequence b,209  
 682\_at,----,----,----,----,----,----,----,----,----,2.41,4.44E-09  
 CBS,BC007257,cystathionine-beta-synthase,1553972\_a\_at,----,----,----,----,----,----,----,----,  
 ----,----,----,----,-2.07,2.35E-07  
 CBX4,AI570531,"chromobox homolog 4 (Pc class homolog, Drosophila)",227558\_at,y  
 es,----,----,----,----,----,----,----,----,----,1.77,2.46E-05  
 CCNB1,N90191,cyclin B1,228729\_at,yes,yes,----,----,----,----,----,----,----,----,----,1.62,1.35  
 E-05  
 CCNB1IP1,NM\_021178,cyclin B1 interacting protein 1,217988\_at,----,----,----,----,----,----,  
 ----,----,----,----,----,----,----,----,----,2.28,2.32E-08  
 CCND3,NM\_001760,cyclin D3,201700\_at,yes,yes,----,----,----,----,----,----,----,----,----,1.78,9  
 .00E-07  
 CCNE2,NM\_004702,cyclin E2,205034\_at,yes,yes,----,----,----,----,----,----,----,----,----,1.98,  
 4.55E-06  
 CCNK,AA528091,cyclin K,225824\_at,yes,yes,----,----,----,----,----,----,----,----,----,2.24,1.36  
 E-06  
 CD164,AF263279,"CD164 molecule, sialomucin",208653\_s\_at,----,----,----,----,----,----,----,----,  
 ----,----,----,----,----,----,----,----,----,1.56,4.43E-05  
 CD164,BF669455,"CD164 molecule, sialomucin",208654\_s\_at,----,----,----,----,----,----,----,----,  
 ----,----,----,----,----,----,----,----,----,1.9,8.84E-08  
 CD164,NM\_006016,"CD164 molecule, sialomucin",208405\_s\_at,----,----,----,----,----,----,----,----,  
 ----,----,----,----,----,----,----,----,----,2.03,3.94E-08  
 CD24,AA761181,CD24 molecule,209771\_x\_at,----,----,----,----,----,----,----,----,----,2.  
 84,1.09E-12  
 CD24,M58664,CD24 molecule,208651\_x\_at,----,----,----,----,----,----,----,----,----,2.85  
 ,4.64E-11  
 CD24,AK000168,CD24 molecule,216379\_x\_at,----,----,----,----,----,----,----,----,----,2.  
 87,3.24E-12  
 CD24,X69397,CD24 molecule,209772\_s\_at,----,----,----,----,----,----,----,----,----,3.1,  
 8.47E-12  
 CD24,L33930,CD24 molecule,266\_s\_at,----,----,----,----,----,----,----,----,----,3.17,2.  
 93E-11  
 CD24,BG327863,CD24 molecule,208650\_s\_at,----,----,----,----,----,----,----,----,----,3.  
 58,3.94E-13













FLJ11506,NM\_024666,hypothetical protein FLJ11506,202852\_s\_at,----,----,----,----,----,  
----,----,----,----,----,-1.55,6.77E-04  
FLJ20323,BC005883,hypothetical protein FLJ20323,211724\_x\_at,----,----,----,----,----,  
----,----,----,----,----,-1.56,8.02E-04  
FLJ20628,NM\_017910,hypothetical protein FLJ20628,221229\_s\_at,----,----,----,----,----,  
----,yes,----,----,-1.54,2.48E-04  
FLJ23861,AI680874,hypothetical protein FLJ23861,231252\_at,----,----,----,----,----,  
----,----,----,----,----,-1.69,1.93E-05  
FLJ38482\_///\_ZNF320,BC036301,zinc finger protein 320\_///\_hypothetical protein  
FLJ38482,1555790\_a\_at,----,----,----,----,----,yes,----,----,-1.86,2.73E-07  
FLNA,NM\_001456,"filamin A, alpha (actin binding protein 280)",200859\_x\_at,----,  
----,yes,----,----,yes,----,1.67,1.13E-05  
FLNA,AI625550,"filamin A, alpha (actin binding protein 280)",214752\_x\_at,----,  
----,yes,----,----,yes,----,1.74,8.05E-06  
FLNA,AW051856,"filamin A, alpha (actin binding protein 280)",213746\_s\_at,----,  
----,yes,----,----,yes,----,1.87,5.40E-06  
FN1,AF130095,fibronectin 1,210495\_x\_at,----,----,----,----,----,yes,----,2.9  
5,1.19E-09  
FN1,AK026737,fibronectin 1,216442\_x\_at,----,----,----,----,----,yes,----,3.1  
7,7.59E-10  
FN1,BC005858,fibronectin 1,211719\_x\_at,----,----,----,----,----,yes,----,3.1  
4,8.96E-11  
FN1,X02761,fibronectin 1,212464\_s\_at,----,----,----,----,----,yes,----,3.17,  
3.92E-09  
FOLR1,NM\_016725,folate receptor 1 (adult),204437\_s\_at,----,----,----,----,----,  
----,----,----,-2.15,7.38E-07  
FOXP1,AW080845,forkhead box P1,224837\_at,----,----,----,----,----,yes,----,----,1  
.51,1.52E-04  
FSCN1,NM\_003088,"fascin homolog 1, actin-bundling protein (Strongylocentrotus  
purpuratus)",201564\_s\_at,----,----,----,yes,----,----,----,----,1.66,8.06E-05  
FTH1,AA083483,"ferritin, heavy polypeptide 1",214211\_at,----,----,----,----,----,  
----,----,----,1.73,5.37E-06  
FTSJ3,NM\_017647,FtsJ homolog 3 (E. coli),218103\_at,----,----,----,----,----,yes  
,----,----,1.75,1.15E-05  
FUCA2,BC003060,"fucosidase, alpha-L- 2, plasma",223120\_at,----,----,----,----,----,  
----,----,----,-1.78,4.27E-07  
FUSIP1\_///\_LOC642558\_///\_LOC727922,AU130523,FUS interacting protein (serine/ar  
ginine-rich) 1\_///\_similar to FUS interacting protein (serine-arginine rich) 1  
\_///\_similar to FUS-interacting serine-arginine-rich protein 1 (TLS-associated  
protein with Ser-Arg repeats) (TLS-associated protein with SR repeats) (TASR)  
(TLS-associated serine-arginine protein) (TLS-associated SR protein) (Neural-  
specific SR protein...,213594\_x\_at,----,----,yes,----,----,yes,----,----,-1.61,8  
.27E-06  
FZD10,NM\_007197,frizzled homolog 10 (Drosophila),219764\_at,----,----,----,----,----,  
----,----,yes,----,-2.37,7.09E-08  
FZD2,L37882,frizzled homolog 2 (Drosophila),210220\_at,----,----,----,----,----,  
----,yes,----,1.55,6.88E-04  
FZD6,NM\_003506,frizzled homolog 6 (Drosophila),203987\_at,----,----,----,----,----,  
----,yes,----,-3.09,1.20E-11  
G3BP1,BG500067,GTPase activating protein (SH3 domain) binding protein 1,201503  
\_at,----,----,----,----,----,yes,yes,----,1.56,7.42E-06  
GADD45A,NM\_001924,"growth arrest and DNA-damage-inducible, alpha",203725\_at,ye  
s,yes,----,----,yes,----,yes,----,----,-2.18,3.02E-08  
GALNT1,AV692127,UDP-N-acetyl-alpha-D-galactosamine:polypeptide N-acetylgalacto  
saminyltransferase 1 (GalNAc-T1),201722\_s\_at,----,----,----,----,----,----,  
----,1.84,8.80E-07  
GALNT1,U41514,UDP-N-acetyl-alpha-D-galactosamine:polypeptide N-acetylgalactosa  
minyltransferase 1 (GalNAc-T1),201723\_s\_at,----,----,----,----,----,----,  
----,1.85,1.32E-06  
GALNT1,BC038440,UDP-N-acetyl-alpha-D-galactosamine:polypeptide N-acetylgalacto  
saminyltransferase 1 (GalNAc-T1),1568618\_a\_at,----,----,----,----,----,----,  
----,1.94,6.34E-07  
GALNT1,NM\_020474,UDP-N-acetyl-alpha-D-galactosamine:polypeptide N-acetylgalact  
osaminyltransferase 1 (GalNAc-T1),201724\_s\_at,----,----,----,----,----,----,  
----,2.53,1.33E-08  
GALNT2,NM\_004481,UDP-N-acetyl-alpha-D-galactosamine:polypeptide N-acetylgalact  
osaminyltransferase 2 (GalNAc-T2),217788\_s\_at,----,----,----,----,----,----,  
----,1.95,7.79E-07  
GALNT2,AL525086,UDP-N-acetyl-alpha-D-galactosamine:polypeptide N-acetylgalacto  
saminyltransferase 2 (GalNAc-T2),217787\_s\_at,----,----,----,----,----,----,  
----,2.15,4.19E-07  
GALNT2,AF130059,UDP-N-acetyl-alpha-D-galactosamine:polypeptide N-acetylgalacto  
saminyltransferase 2 (GalNAc-T2),223991\_s\_at,----,----,----,----,----,----,  
----,2.2,1.21E-07  
GALNT7,BF699855,UDP-N-acetyl-alpha-D-galactosamine:polypeptide N-acetylgalacto  
saminyltransferase 7 (GalNAc-T7),222587\_s\_at,----,----,----,----,----,----,  
----,1.56,2.91E-05  
GARS,D30658,glycyl-tRNA synthetase,208693\_s\_at,----,----,----,----,----,----,  
----,-2.87,1.70E-12  
GART,AI207338,"Phosphoribosylglycinamide formyltransferase, phosphoribosylglyc  
inamide synthetase, phosphoribosylaminoimidazole synthetase",230097\_at,----,----

```

,-----,-----,-----,-----,-----,-----,-1.55,5.37E-05
GAS1,NM_002048,growth_arrest-specific_1,204457_s_at,yes,yes,-----,-----,-----,-----,-----,-----
,-----,-----,-----,-----,-----,-----,1.94,1.44E-05
GAS2L3,AI860012,Growth_arrest-specific_2_like_3,238756_at,yes,yes,-----,-----,-----,-----,-----,-----
,-----,-----,-----,-----,-----,-----,1.51,5.59E-04
GAS5,AI056992,growth_arrest-specific_5,227517_s_at,-----,-----,-----,-----,-----,-----,-----,-----
,-----,-----,-----,-----,-----,-----,1.75,6.79E-06
GAS5,AW105301,growth_arrest-specific_5,228238_at,-----,-----,-----,-----,-----,-----,-----,-----
,-----,-----,-----,-----,-----,-----,1.81,1.12E-05
GBAS,NM_001483,glioblastoma_amplified_sequence,201816_s_at,-----,-----,-----,-----,-----,-----,-----,-----
,yes,-----,-----,-----,-----,-----,-----,-1.64,4.68E-06
GDA,AF019638,guanine_deaminase,224209_s_at,-----,-----,-----,-----,-----,-----,-----,-----
,-2.66,2.90E-09
GEMIN4,AF258545,gem_(nuclear_organelle)_associated_protein_4,217099_s_at,-----,-----,-----,-----,-----,-----
,-----,-----,-----,-----,-----,-----,-----,-----,-----,-----,-----,-----,-----,-----,-----,-----,-----
,yes,-----,-----,-----,-----,-----,-----,1.86,4.83E-06
GEMIN4,NM_015487,gem_(nuclear_organelle)_associated_protein_4,205527_s_at,-----,-----,-----,-----,-----,-----
,-----,-----,-----,-----,-----,-----,-----,-----,-----,-----,-----,-----,-----,-----,-----,-----,-----
,yes,-----,-----,-----,-----,-----,-----,1.91,3.95E-06
GJA1,NM_000165,"gap_junction_protein_alpha_1_43kDa",201667_at,-----,-----,-----,-----,-----,-----
,-----,-----,-----,-----,-----,-----,-----,-----,-----,-----,-----,-----,-----,-----,-----,-----,-----
,yes,-----,-----,-----,-----,-----,-----,1.79,2.95E-06
GLIPR1,AI912583,GLI_pathogenesis-related_1_(glioma),214085_x_at,-----,-----,-----,-----,-----,-----
,-----,-----,-----,-----,-----,-----,-----,-----,-----,-----,-----,-----,-----,-----,-----,-----,-----
,-----,-----,-----,-----,-----,-----,2.08,3.85E-07
GLIPR1,NM_006851,GLI_pathogenesis-related_1_(glioma),204222_s_at,-----,-----,-----,-----,-----,-----
,-----,-----,-----,-----,-----,-----,-----,-----,-----,-----,-----,-----,-----,-----,-----,-----,-----
,-----,-----,-----,-----,-----,-----,2.24,3.99E-08
GLIPR1,AV682252,GLI_pathogenesis-related_1_(glioma),226142_at,-----,-----,-----,-----,-----,-----
,-----,-----,-----,-----,-----,-----,-----,-----,-----,-----,-----,-----,-----,-----,-----,-----,-----
,-----,-----,-----,-----,-----,-----,2.52,8.19E-08
GLIPR1,N32834,GLI_pathogenesis-related_1_(glioma),226136_at,-----,-----,-----,-----,-----,-----
,-----,-----,-----,-----,-----,-----,-----,-----,-----,-----,-----,-----,-----,-----,-----,-----,-----
,yes,-----,-----,-----,-----,-----,-----,2.61,1.99E-08
GLO1,NM_006708,glyoxalase_I,200681_at,yes,-----,-----,-----,-----,-----,-----,-----,-----,-----,-----,-----
,-----,-----,-----,-----,-----,-----,-----,-----,-----,-----,-----,-----,-----,-----,-----,-----,-----
,-----,-----,-----,-----,-----,-----,3,1.32E-07
GLRX5,AA133341,glutaredoxin_5_homolog_(S_cerevisiae),221932_s_at,-----,-----,-----,-----,-----,-----
,-----,-----,-----,-----,-----,-----,-----,-----,-----,-----,-----,-----,-----,-----,-----,-----,-----
,yes,1.53,4.04E-05
GMPS,NM_003875,guanine_monphosphate_synthetase,214431_at,-----,-----,-----,-----,-----,-----
,-----,-----,-----,-----,-----,-----,-----,-----,-----,-----,-----,-----,-----,-----,-----,-----,-----
,-----,-----,-----,-----,-----,-----,-1.68,1.60E-06
GNG10_///_LOC552891,NM_004125,"guanine_nucleotide_binding_protein_(G_protein),_gamma_10_///_hypothetical_protein_LOC552891",201921_at,-----,-----,-----,-----,-----,-----
,-----,-----,-----,-----,-----,-----,-----,-----,-----,-----,-----,-----,-----,-----,-----,-----,-----
,yes,-----,-----,-----,-----,-----,-----,-2.36,1.26E-09
GOLPH4,NM_014498,golgi_phosphoprotein_4,204324_s_at,-----,-----,-----,-----,-----,-----
,-----,-----,-----,-----,-----,-----,-----,-----,-----,-----,-----,-----,-----,-----,-----,-----,-----
,-----,-----,-----,-----,-----,-----,1.99,5.33E-08
GOT1,BC000498,"glutamic-oxaloacetic_transaminase_1_soluble_(aspartate_aminotr_ansferase_1)",208813_at,-----,-----,-----,-----,-----,-----
,-----,-----,-----,-----,-----,-----,-----,-----,-----,-----,-----,-----,-----,-----,-----,-----,-----
,-----,-----,-----,-----,-----,-----,-1.8,1.12E-06
GPR125,M37712,G_protein-coupled_receptor_125,210473_s_at,-----,-----,-----,-----,-----,-----
,-----,-----,-----,-----,-----,-----,-----,-----,-----,-----,-----,-----,-----,-----,-----,-----,-----
,yes,-----,-----,-----,-----,-----,-----,1.5,0.00109
GPR177,AL534095,G_protein-coupled_receptor_177,228949_at,-----,-----,-----,-----,-----,-----
,-----,-----,-----,-----,-----,-----,-----,-----,-----,-----,-----,-----,-----,-----,-----,-----,-----
,yes,yes,-----,-----,-----,-----,-----,-----,-1.87,7.42E-06
GPR177,AL534095,G_protein-coupled_receptor_177,228950_s_at,-----,-----,-----,-----,-----,-----
,-----,-----,-----,-----,-----,-----,-----,-----,-----,-----,-----,-----,-----,-----,-----,-----,-----
,yes,yes,-----,-----,-----,-----,-----,-----,-1.56,5.82E-04
GPRC5A,NM_003979,"G_protein-coupled_receptor_family_C_group_5_member_A",203108_at,-----,-----,-----,-----,-----,-----
,-----,-----,-----,-----,-----,-----,-----,-----,-----,-----,-----,-----,-----,-----,-----,-----,-----
,yes,-----,-----,-----,-----,-----,-----,2.78,1.19E-08
GREM1,AF154054,"gremlin_1_cysteine_knot_superfamily_homolog_(Xenopus_laevis)",218468_s_at,-----,-----,-----,-----,-----,-----
,-----,-----,-----,-----,-----,-----,-----,-----,-----,-----,-----,-----,-----,-----,-----,-----,-----
,-----,-----,-----,-----,-----,-----,-2,1.42E-06
GREM1,NM_013372,"gremlin_1_cysteine_knot_superfamily_homolog_(Xenopus_laevis)",218469_at,-----,-----,-----,-----,-----,-----
,-----,-----,-----,-----,-----,-----,-----,-----,-----,-----,-----,-----,-----,-----,-----,-----,-----
,-----,-----,-----,-----,-----,-----,-1.99,7.55E-06
GRPEL2,BF185904,"GrpE-like_2_mitochondrial_(E_coli)",226881_at,-----,-----,-----,-----,-----,-----
,-----,-----,-----,-----,-----,-----,-----,-----,-----,-----,-----,-----,-----,-----,-----,-----,-----
,yes,-----,-----,-----,-----,-----,-----,-1.98,1.17E-06
GTF2IRD1,NM_016328,GTF2I_repeat_domain_containing_1,218412_s_at,-----,-----,-----,-----,-----,-----
,-----,-----,-----,-----,-----,-----,-----,-----,-----,-----,-----,-----,-----,-----,-----,-----,-----
,yes,-----,-----,-----,-----,-----,-----,-1.5,1.49E-04
GTPBP10,AC006153,GTP-binding_protein_10_(putative),234311_s_at,-----,-----,-----,-----,-----,-----
,-----,-----,-----,-----,-----,-----,-----,-----,-----,-----,-----,-----,-----,-----,-----,-----,-----
,-----,-----,-----,-----,-----,-----,-1.78,9.94E-06
GUK1,BC006249,guanylate_kinase_1,200075_s_at,-----,-----,-----,-----,-----,-----
,-----,-----,-----,-----,-----,-----,-----,-----,-----,-----,-----,-----,-----,-----,-----,-----,-----
,-----,-----,-----,-----,-----,-----,1.68,3.42E-05
H2BFS_///_HIST1H2BK,NM_017445,"H2B_histone_family_member_S_///_histone_cluste_r_1_H2bk",208579_x_at,-----,-----,-----,-----,-----,-----
,-----,-----,-----,-----,-----,-----,-----,-----,-----,-----,-----,-----,-----,-----,-----,-----,-----
,yes,-----,-----,-----,-----,-----,-----,2.54,1.96E-09
HACL1,BC001627,2-hydroxyacyl-CoA_lyase_1,223211_at,-----,-----,-----,-----,-----,-----
,-----,-----,-----,-----,-----,-----,-----,-----,-----,-----,-----,-----,-----,-----,-----,-----,-----
,-----,-----,-----,-----,-----,-----,-1.75,3.62E-05
HAX1,NM_006118,HCLS1_associated_protein_X-1,201145_at,-----,-----,-----,-----,-----,-----
,-----,-----,-----,-----,-----,-----,-----,-----,-----,-----,-----,-----,-----,-----,-----,-----,-----
,yes,yes,-----,-----,-----,-----,-----,-----,-1.72,3.55E-07
HCCS,AI801013,holocytochrome_c_synthase_(cytochrome_c_heme-lyase),203745_at,-----,-----,-----,-----,-----,-----
,-----,-----,-----,-----,-----,-----,-----,-----,-----,-----,-----,-----,-----,-----,-----,-----,-----
,-----,-----,-----,-----,-----,-----,1.66,3.03E-06
hCG_1806964,AA093668,hCG1806964,235173_at,-----,-----,-----,-----,-----,-----
,-----,-----,-----,-----,-----,-----,-----,-----,-----,-----,-----,-----,-----,-----,-----,-----,-----
,-----,-----,-----,-----,-----,-----,1.68,2.61E-05
hCG_1815491_///_LOC650242,AA954994,hCG1815491_///_hypothetical_protein_LOC650242,238021_s_at,-----,-----,-----,-----,-----,-----
,-----,-----,-----,-----,-----,-----,-----,-----,-----,-----,-----,-----,-----,-----,-----,-----,-----
,-----,-----,-----,-----,-----,-----,-2.24,3.62E-08
hCG_21078_///_RPL27A,NM_000990,ribosomal_protein_L27a_///_hCG21078,203034_s_at,-----,-----,-----,-----,-----,-----
,-----,-----,-----,-----,-----,-----,-----,-----,-----,-----,-----,-----,-----,-----,-----,-----,-----
,-----,-----,-----,-----,-----,-----,1.52,1.66E-08
HECTD1,BC006237,HECT_domain_containing_1,224481_s_at,-----,-----,-----,-----,-----,-----
,-----,-----,-----,-----,-----,-----,-----,-----,-----,-----,-----,-----,-----,-----,-----,-----,-----
,-----,-----,-----,-----,-----,-----,-2,3.69E-07
HERC4,AI819938,hect_domain_and_RLD_4,225988_at,-----,-----,-----,-----,-----,-----
,-----,-----,-----,-----,-----,-----,-----,-----,-----,-----,-----,-----,-----,-----,-----,-----,-----
,-----,-----,-----,-----,-----,-----,1.56,6.34E-05
HERPUD1,AF217990,"homocysteine-inducible_endoplasmic_reticulum_stress-inducib_le_ubiquitin-like_domain_member_1",217168_s_at,-----,-----,-----,-----,-----,-----
,-----,-----,-----,-----,-----,-----,-----,-----,-----,-----,-----,-----,-----,-----,-----,-----,-----
,-----,-----,-----,-----,-----,-----,-2.64,2.88E-11
HGS,AF260566,hepatocyte_growth_factor-regulated_tyrosine_kinase_substrate,2104

```















,---,---,yes,---,---,---,-1.56,1.32E-05  
NOB1,BC000050,NIN1/RPN12 binding protein 1 homolog (S. cerevisiae),223018\_at,---,---,---,---,---,-2.43,2.43E-09  
NPM1,AA191576,"nucleophosmin (nucleolar phosphoprotein B23, numatrin)",221923\_s\_at,yes,---,yes,yes,---,---,yes,yes,---,-1.64,4.19E-07  
NPTN,NM\_017455,neuroligin 1,202228\_s\_at,---,---,---,---,---,---,---,---,---,1.57,2.27E-06  
NPTX1,NM\_002522,neuronal pentraxin I,204684\_at,---,---,---,---,---,---,---,---,---,1.5,0.001153  
NR2F1,AI951185,"Nuclear receptor subfamily 2, group F, member 1",209505\_at,---,---,---,---,---,---,---,---,---,1.64,5.45E-05  
NR3C1,X03348,"nuclear receptor subfamily 3, group C, member 1 (glucocorticoid receptor)",216321\_s\_at,---,---,---,---,---,---,---,---,---,1.72,1.57E-07  
NR3C1,AI432196,"nuclear receptor subfamily 3, group C, member 1 (glucocorticoid receptor)",201865\_x\_at,---,---,---,---,---,---,---,---,---,1.52,6.52E-05  
NSFL1C,AK023585,NSFL1 (p97) cofactor (p47),232520\_s\_at,---,---,---,---,---,---,---,---,---,1.51,7.38E-04  
NSMCE2,AL562908,"non-SMC element 2, MMS21 homolog (S. cerevisiae)",226536\_at,---,---,---,---,---,---,---,---,---,-2.07,3.41E-07  
NT5E,NM\_002526,"5'-nucleotidase, ecto (CD73)",203939\_at,---,---,---,---,---,---,---,---,---,1.59,4.22E-05  
NUDCD1,AI802955,NudC domain containing 1,225439\_at,---,---,---,---,---,---,---,---,---,-2.32,4.58E-08  
NUP210,AI867102,nucleoporin 210kDa,213947\_s\_at,---,---,---,---,---,---,---,---,---,-1.52,2.67E-04  
NXT2,AK023289,nuclear transport factor 2-like export factor 2,209628\_at,---,---,---,---,---,---,---,---,---,1.57,3.33E-04  
OGT,U77413,O-linked N-acetylglucosamine (GlcNAc) transferase (UDP-N-acetylglucosamine:polypeptide-N-acetylglucosaminyl transferase),207563\_s\_at,---,---,---,---,---,---,---,---,---,2.4,4.05E-08  
OGT,BF001665,O-linked N-acetylglucosamine (GlcNAc) transferase (UDP-N-acetylglucosamine:polypeptide-N-acetylglucosaminyl transferase),212307\_s\_at,---,---,---,---,---,---,---,---,---,-2.18,1.99E-08  
OGT,AI742039,O-linked N-acetylglucosamine (GlcNAc) transferase (UDP-N-acetylglucosamine:polypeptide-N-acetylglucosaminyl transferase),229787\_s\_at,---,---,---,---,---,---,---,---,---,-2.02,8.25E-06  
OGT,NM\_003605,O-linked N-acetylglucosamine (GlcNAc) transferase (UDP-N-acetylglucosamine:polypeptide-N-acetylglucosaminyl transferase),207564\_x\_at,---,---,---,---,---,---,---,---,---,-1.83,9.79E-07  
OLFM1,NM\_006334,olfactomedin 1,205591\_at,---,---,---,---,---,---,---,---,---,1.57,6.06E-06  
OLFM1,R38389,olfactomedin 1,213131\_at,---,---,---,---,---,---,---,---,---,1.73,2.01E-07  
OLFML2A,AL050002,olfactomedin-like 2A,213075\_at,---,---,---,---,---,---,---,---,---,1.75,7.29E-05  
OPN3,NM\_014322,"opsin 3 (encephalopsin, panopsin)",219032\_x\_at,---,---,---,---,---,---,---,---,---,1.58,3.49E-05  
ORC5L,NM\_002553,"origin recognition complex, subunit 5-like (yeast)",204957\_at,---,---,---,---,---,---,---,---,---,-1.98,9.39E-08  
OSBPL10,NM\_017784,oxysterol binding protein-like 10,219073\_s\_at,---,---,---,---,---,---,---,---,---,1.76,1.17E-06  
OSMR,BC010943,oncostatin M receptor,1554008\_at,---,---,---,---,---,---,---,---,---,1.61,6.55E-04  
PABPC1,AI734929,"poly(A) binding protein, cytoplasmic 1",215157\_x\_at,---,---,---,---,---,---,---,---,---,-1.87,2.48E-08  
PABPC3,NM\_030979,"poly(A) binding protein, cytoplasmic 3",208113\_x\_at,---,---,---,---,---,---,---,---,---,-1.68,5.56E-07  
PAIP2,BC001716,poly(A) binding protein interacting protein 2,222983\_s\_at,---,---,---,---,---,---,---,---,---,-1.56,2.54E-05  
PALB2,NM\_024675,partner and localizer of BRCA2,219530\_at,---,---,---,---,---,---,---,---,---,-1.58,8.88E-05  
PALLD,NM\_016081,"palladin, cytoskeletal associated protein",200897\_s\_at,---,---,---,---,---,---,---,---,---,1.6,1.45E-06  
PALLD,AK025843,"palladin, cytoskeletal associated protein",200906\_s\_at,---,---,---,---,---,---,---,---,---,1.66,1.67E-05  
PALLD,AU157932,"palladin, cytoskeletal associated protein",200907\_s\_at,---,---,---,---,---,---,---,---,---,1.73,1.06E-06  
PAM,AI022882,peptidylglycine alpha-amidating monooxygenase,212958\_x\_at,---,---,---,---,---,---,---,---,---,1.89,7.47E-07  
PAM,NM\_000919,peptidylglycine alpha-amidating monooxygenase,202336\_s\_at,---,---,---,---,---,---,---,---,---,1.92,2.18E-07  
PAPPA,BF107618,"pregnancy-associated plasma protein A, pappalysin 1",224940\_s\_at,---,---,---,---,---,---,---,---,---,-1.89,6.26E-05  
PAQR3,AW173157,progesterone and adipoQ receptor family member III,213372\_at,---,---,---,---,---,---,---,---,---,1.78,2.12E-06  
PARN,NM\_002582,poly(A)-specific ribonuclease (deadenylation nuclease),203905\_at,---,---,---,---,---,---,---,---,---,-1.53,3.14E-04  
PBK,NM\_018492,PDZ binding kinase,219148\_at,---,---,---,---,---,---,---,---,---,-1.64,9.29E-07  
PCM1,AI924817,pericentriolar material 1,214937\_x\_at,---,---,---,---,---,---,---,---,---,1.57,9.73E-04  
PCSK9,W92036,proprotein convertase subtilisin/kexin type 9,227759\_at,---,---,---,---,---,---,---,---,---,1.57,9.73E-04

















TRIOBP,AF281030,TRIO and F-actin binding protein,210276\_s at,----,----,----,yes,--  
--,----,yes,----,----,1.79,3.80E-05  
TRPS1,AF264784,trichorhinophalangeal syndrome I,224218\_s at,----,----,----,----,--  
--,----,yes,----,----,-2.1,3.97E-07  
TRPS1,BF701166,trichorhinophalangeal syndrome I,222651\_s at,----,----,----,----,--  
--,----,yes,----,----,-1.55,1.59E-04  
TRPS1,NM\_014112,trichorhinophalangeal syndrome I,218502\_s at,----,----,----,----,--  
--,----,yes,----,----,-1.54,5.54E-04  
TSC22D3,AL110191,"TSC22 domain family, member 3",208763\_s at,----,----,----,----,--  
--,----,----,----,-3.15,1.04E-11  
TSHZ1,W60810,teashirt family zinc finger 1,223282\_at,----,----,----,----,----,Y  
es,----,----,-1.53,0.003217  
TSPAN13,NM\_014399,Tetraspanin 13,217979\_at,----,----,----,----,----,----  
,1.88,2.26E-06  
TTC32,BE465877,tetratricopeptide repeat domain 32,226838\_at,----,----,----,----,----  
--,----,----,----,-2.22,1.20E-07  
TUBA4A,AL565074,"tubulin, alpha 4a",212242\_at,----,----,----,yes,----,----,----,  
---,1.76,2.04E-07  
TUBB,AF141349,"tubulin, beta",209026\_x at,yes,----,----,yes,----,----,----,  
1.7,2.55E-07  
TUBB,BC005838,"tubulin, beta",211714\_x at,yes,----,----,yes,----,----,----,  
1.75,8.75E-08  
TUBB,BC001002,"tubulin, beta",212320\_at,yes,----,----,yes,----,----,----,----,1.  
85,1.50E-08  
TUBB2A,NM\_001069,"tubulin, beta 2A",204141\_at,----,----,----,yes,----,----,----,  
---,2.67,4.53E-09  
TUBB2C,AA515698,"tubulin, beta 2C",213726\_x at,yes,----,yes,yes,----,----,----,----  
,----,2.6,8.05E-12  
TUBB2C,BC004188,"tubulin, beta 2C",208977\_x at,yes,----,yes,yes,----,----,----,----  
,----,2.75,2.83E-12  
TUBB3,NM\_006086,"tubulin, beta 3",202154\_x at,----,----,----,yes,----,----,----,yes,  
---,2.56,8.96E-11  
TUBB3,AL565749,"tubulin, beta 3",213476\_x at,----,----,----,yes,----,----,----,yes,--  
--,2.58,1.26E-10  
TUBB6,BC002654,"tubulin, beta 6",209191\_at,----,----,----,yes,----,----,----,----  
,2.45,5.19E-10  
TUSC3,AI884858,tumor suppressor candidate 3,213423\_x at,----,----,----,----,----,----  
--,----,----,yes,-1.62,2.41E-06  
TUSC3,U42349,tumor suppressor candidate 3,209228\_x at,----,----,----,----,----,----  
--,----,----,yes,-1.57,2.51E-05  
TXNDC1,NM\_030755,thioredoxin domain containing 1,208097\_s at,yes,----,----,----,----,  
---,----,----,yes,yes,-3.17,3.54E-11  
TXNDC1,AL080080,thioredoxin domain containing 1,209476\_at,yes,----,----,----,----,  
---,----,yes,yes,-2.58,3.66E-10  
TXNIP,AA812232,thioredoxin interacting protein,201008\_s at,----,----,----,----,----  
,----,----,----,----,-2.98,3.86E-10  
TXNIP,NM\_006472,thioredoxin interacting protein,201010\_s at,----,----,----,----,----  
--,----,----,----,----,-2.77,1.58E-09  
TXNIP,AI439556,thioredoxin interacting protein,201009\_s at,----,----,----,----,----  
,----,----,----,----,-2.72,3.52E-09  
UBAP2,AK026088,ubiquitin associated protein 2,221839\_s at,----,----,----,----,----,  
---,----,----,----,1.53,3.12E-04  
UBAP2,NM\_018449,ubiquitin associated protein 2,219192\_at,----,----,----,----,----,  
---,----,----,----,1.86,1.13E-06  
UBAP2L,NM\_014847,ubiquitin associated protein 2-like,201378\_s at,----,----,----,----,  
---,----,----,----,1.83,1.68E-07  
UBAP2L,NM\_014847,ubiquitin associated protein 2-like,201377\_at,----,----,----,----,  
---,----,----,----,1.95,1.38E-07  
UBE2Q2,AK000617,ubiquitin-conjugating enzyme E2Q (putative) 2,224747\_at,----,--  
--,----,----,----,2.24,2.93E-08  
UCP2,U94592,"uncoupling protein 2 (mitochondrial, proton carrier)",208998\_at,--  
--,----,----,----,----,1.94,1.13E-05  
UFM1,BC005193,ubiquitin-fold modifier 1,222502\_s at,----,----,----,----,----,ye  
s,----,----,-1.91,4.28E-06  
UFM1,NM\_016617,ubiquitin-fold modifier 1,218050\_at,----,----,----,----,----,yes  
,----,----,-1.73,4.27E-07  
UPF2,NM\_015542,UPF2 regulator of nonsense transcripts homolog (yeast),203519\_s  
\_at,----,----,----,----,----,----,-1.6,2.33E-04  
UPF3B,NM\_023010,UPF3 regulator of nonsense transcripts homolog B (yeast),21875  
7\_s at,----,----,----,----,----,----,yes,----,----,-1.75,2.79E-06  
USP1,NM\_003368,ubiquitin specific peptidase 1,202413\_s at,----,----,----,----,yes,  
---,yes,----,----,-1.63,8.69E-06  
USP1,AW499935,ubiquitin specific peptidase 1,202412\_s at,----,----,----,----,yes,--  
--,yes,----,----,-1.51,2.09E-05  
USP15,AF153604,ubiquitin specific peptidase 15,210681\_s at,----,----,----,----,----  
--,----,----,----,-1.81,9.78E-06  
USP3,AF077040,ubiquitin specific peptidase 3,221654\_s at,----,----,----,----,----,  
---,----,----,----,-1.68,8.22E-06  
VAPA,AF154847,"VAMP (vesicle-associated membrane protein)-associated protein A  
, 33kDa",208780\_x at,----,----,----,----,----,----,yes,----,-1.52,3.21E-05  
VCP,W60953,valosin-containing protein,208648\_at,yes,----,----,----,yes,----,yes,ye



--,,yes,--,--,-2.1,2.90E-07  
ZC3HAV1,BG533558,"zinc\_finger\_CCCH-type\_antiviral\_1",225634\_at,--,--,,--,,--  
--,,yes,--,--,,1.91,8.22E-06  
ZCCHC7,BG291039,"zinc\_finger\_CCHC\_domain\_containing\_7",226496\_at,--,--,,--,,--  
--,,--,,-1.92,1.42E-06  
ZCCHC8,NM\_017612,"zinc\_finger\_CCHC\_domain\_containing\_8",218478\_s\_at,--,--,,--,,--  
--,,--,,-1.95,2.09E-06  
ZFAND1,NM\_024699,"zinc\_finger\_AN1-type\_domain\_1",218919\_at,--,--,,--,,--  
--,,--,,-2.44,7.69E-09  
ZFP91,AA758013,zinc\_finger\_protein\_91\_homolog\_(mouse),224631\_at,--,--,,--,,--  
--,,yes,--,--,,-1.7,4.40E-05  
ZFP91,AL045405,zinc\_finger\_protein\_91\_homolog\_(mouse),224636\_at,--,--,,--,,--  
--,,yes,--,--,,-1.57,1.96E-05  
ZNF146,BC005154,zinc\_finger\_protein\_146,1554433\_a\_at,--,--,,--,,--,,yes,  
es,--,--,,-1.5,6.84E-04  
ZNF281,AA121673,Zinc\_finger\_protein\_281,228785\_at,--,--,,--,,--,,yes,  
--,,--,,1.69,8.67E-06  
ZNF281,AU150752,zinc\_finger\_protein\_281,222619\_at,--,--,,--,,--,,yes,  
--,,--,,1.72,2.20E-05  
ZNF313,AF090934,zinc\_finger\_protein\_313,211678\_s\_at,--,--,,--,,--,,--  
--,,--,,-1.77,2.13E-05  
ZNF706,NM\_016096,zinc\_finger\_protein\_706,218059\_at,--,--,,--,,--,,yes,  
--,,--,,-1.93,1.62E-08  
ZZZ3,AL080063,"zinc\_finger\_ZZ-type\_containing\_3",212893\_at,--,--,,--,,--,,--  
--,,yes,--,--,,-1.9,1.19E-06  
--,,NM\_016947,--,222968\_at,--,--,,--,,--,,-2.19,3.31E-08  
--,,BE312027,--,213642\_at,--,--,,--,,--,,-1.86,7.34E-06  
--,,AA775408,--,224893\_at,--,--,,--,,--,,-1.59,1.11E-05  
--,,BF677084,--,238342\_at,--,--,,--,,--,,-1.57,0.040074  
--,,BF591637,--,240698\_s\_at,--,--,,--,,--,,yes,--,--,,-1.57,6.69E-0  
4  
--,,AI494291,--,240690\_at,--,--,,--,,--,,--,,-1.56,2.34E-04  
--,,AI056692,--,227278\_at,--,--,,--,,--,,yes,--,--,,1.51,9.07E-04  
--,,AA805633,--,230175\_s\_at,--,--,,--,,--,,yes,yes,--,2,1.91E-07  
--,,AL523076,3'UTR\_of\_hypothetical\_protein\_(ORF1),212233\_at,--,--,,--,,--,,yes,--  
--,,--,,-1.81,1.51E-04  
--,,BF448315,"ARTC1\_mRNA\_complete\_sequence",213015\_at,--,--,,--,,--,,--  
--,,--,,-1.57,1.47E-05  
--,,BF508813,"ARTC1\_mRNA\_complete\_sequence",226331\_at,--,--,,--,,--,,--  
--,,--,,-1.51,7.59E-04  
--,,AA632758,"CDNA\_FLJ22765\_fis\_clone\_KAIA1180",232615\_at,--,--,,--,,--,,--  
--,,--,,-1.59,4.51E-04  
--,,AI252087,"CDNA\_FLJ23242\_fis\_clone\_COL01514",232681\_at,--,--,,--,,--,,--  
--,,yes,--,--,,-1.53,5.31E-05  
--,,BF002121,CDNA\_clone\_IMAGE:4816860,225937\_at,--,--,,--,,--,,--  
--,,--,,1.51,3.04E-04  
--,,AI350995,CDNA\_clone\_IMAGE:4816860,225935\_at,--,--,,--,,--,,--  
--,,--,,1.6,9.57E-05  
--,,BG391282,CDNA\_clone\_IMAGE:4842353,212126\_at,--,--,,--,,--,,yes,--  
--,,--,,1.99,1.22E-06  
--,,BI547087,CDNA\_clone\_IMAGE:5261717,1568983\_a\_at,--,--,,--,,--,,--  
--,,--,,-1.86,4.66E-05  
--,,BF064224,"CDNA\_FLJ12540\_fis\_clone\_NT2RM4000425",226116\_at,--,--,,--,,--  
--,,--,,-1.53,2.17E-04  
--,,AU157881,"CDNA\_FLJ13598\_fis\_clone\_PLACE1009921",227290\_at,--,--,,--,,--  
--,,--,,-2,2.46E-06  
--,,AI983043,"CDNA\_FLJ23679\_fis\_clone\_HEP09084",201410\_at,--,--,,--,,--  
--,,--,,1.8,8.41E-06  
--,,AI760366,"CDNA\_FLJ25706\_fis\_clone\_TST04817",236907\_at,--,--,,--,,--  
--,,yes,--,--,,-1.85,9.67E-06  
--,,AI355441,"CDNA\_FLJ26120\_fis\_clone\_SYN00419",225239\_at,--,--,,--,,--  
--,,--,,1.59,6.68E-05  
--,,H16409,"CDNA\_FLJ30478\_fis\_clone\_BRAWH1000167",227623\_at,--,--,,--,,--  
--,,--,,1.71,8.78E-06  
--,,AW173164,"CDNA\_FLJ31718\_fis\_clone\_NT2RI2006647",226893\_at,--,--,,--,,--  
--,,yes,--,--,,1.71,3.16E-05  
--,,BF698797,"CDNA\_FLJ37884\_fis\_clone\_BRSTN2012451",236300\_at,--,--,,--,,--  
--,,yes,--,--,,-1.61,7.88E-06  
--,,U58658,"CDNA\_FLJ39726\_fis\_clone\_SMINT2015306",224185\_at,--,--,,--,,--  
--,,--,,-1.65,1.28E-04  
--,,AW242820,"CDNA\_FLJ40762\_fis\_clone\_TRACH2002847",227117\_at,--,--,,--,,--  
--,,yes,--,--,,-2.35,7.76E-08  
--,,AI457965,"CDNA\_FLJ41369\_fis\_clone\_BRCAN2006117",225256\_at,--,--,,--,,--  
--,,--,,-1.99,1.78E-05  
--,,AA156754,"CDNA\_FLJ42149\_fis\_clone\_THYMU1000692",225176\_at,--,--,,--,,--  
--,,--,,-1.83,2.06E-05  
--,,AI859767,Full-length\_cDNA\_clone\_CS0DI039YF12\_of\_Placenta\_Cot\_25-normalized  
of\_Homo\_sapiens\_(human),227836\_at,--,--,,--,,--,,-2.36,3  
.88E-08  
--,,AK055769,"Homo\_sapiens\_clone\_IMAGE:2900205\_mRNA",1558801\_at,--,--,,--,,--  
--,,--,,-1.61,9.98E-06  
--,,BC020854,"Homo\_sapiens\_clone\_IMAGE:3906992\_mRNA",1553979\_at,--,--,,--,,--
